# Supplementary material for: Effortful Processing Reduces the Attraction Effect in Multi-Alternative Decision Making: An Electrophysiological Study Using a Task-Irrelevant Probe Technique
Source: PubMed Central journal article supplement (PMC6491867; doi:10.3389/fpsyg.2019.00896), 2019-04-24
Supplement: Table_1.pdf [file Table_1.pdf]

*Supplementary Material*

**Effortful Processing Reduces the Attraction Effect in Multi-alternative Decision Making: An Electrophysiological Study Using a Task-irrelevant Probe Technique**

**Takashi Tsuzuki\*, Yuji Takeda, and Itsuki Chiba**

\* **Correspondence:** Takashi Tsuzuki: [tsuzuki@rikkyo.ac.jp](mailto:tsuzuki@rikkyo.ac.jp)

Table 1 | The trinity choice sets used in the experiment.

| Consumer product<br>or service | Two attributes                    | Set 1 |      |                |                | Set 2 |      |                |                |
|--------------------------------|-----------------------------------|-------|------|----------------|----------------|-------|------|----------------|----------------|
|                                |                                   | A     | B    | D <sub>A</sub> | D <sub>B</sub> | A     | B    | D <sub>A</sub> | D <sub>B</sub> |
| Athletic shoes                 | Quality of design (1–100)         | 80    | 65   | 78             | 63             | 77    | 62   | 75             | 60             |
|                                | Comfort in wearing (1–100)        | 65    | 75   | 63             | 73             | 67    | 77   | 65             | 75             |
| School bag                     | Weight (Kg)                       | 0.80  | 1.20 | 0.87           | 1.27           | 0.70  | 1.10 | 0.77           | 1.17           |
|                                | Quality of design (1–100)         | 65    | 80   | 63             | 78             | 63    | 78   | 61             | 76             |
| Traveler's bag                 | Quality of design (1–100)         | 80    | 65   | 78             | 63             | 78    | 63   | 76             | 61             |
|                                | Weight (Kg)                       | 1.20  | 0.80 | 1.27           | 0.87           | 1.10  | 0.70 | 1.17           | 0.77           |
| Coat                           | Quality of design (1–100)         | 70    | 80   | 68             | 78             | 68    | 78   | 66             | 76             |
|                                | Price (thousand Yen)              | 7.0   | 10.0 | 7.5            | 10.5           | 6.4   | 9.4  | 6.9            | 9.9            |
| Exercise clothes               | Price (thousand Yen)              | 10.0  | 7.0  | 10.5           | 7.5            | 9.4   | 6.4  | 9.9            | 6.9            |
|                                | Quality of design (1–100)         | 80    | 70   | 78             | 68             | 78    | 68   | 76             | 66             |
| Wristwatch                     | Quality of design (1–100)         | 80    | 70   | 78             | 68             | 82    | 72   | 80             | 70             |
|                                | Price (thousand Yen)              | 9.00  | 5.00 | 9.67           | 5.67           | 9.80  | 5.80 | 10.47          | 6.47           |
| MP3 Player                     | Price (thousand Yen)              | 12.00 | 8.00 | 12.67          | 8.67           | 10.70 | 6.70 | 11.37          | 7.37           |
|                                | Sound quality (1–100)             | 76    | 70   | 75             | 69             | 74    | 68   | 73             | 67             |
| Earphones                      | Sound quality (1–100)             | 84    | 70   | 82             | 68             | 82    | 68   | 80             | 66             |
|                                | Price (thousand Yen)              | 4.00  | 3.00 | 4.17           | 3.17           | 3.80  | 2.80 | 3.97           | 2.97           |
| Electronic dictionary          | Repletion of dictionaries (1-100) | 75    | 65   | 73             | 63             | 77    | 67   | 75             | 65             |
|                                | Price (thousand Yen)              | 20.0  | 15.0 | 20.8           | 15.8           | 21.0  | 16.0 | 21.8           | 16.8           |
| Digital camera                 | Image quality (1-100)             | 70    | 76   | 69             | 75             | 72    | 78   | 71             | 77             |
|                                | Repletion of functions (1-100)    | 80    | 65   | 78             | 63             | 75    | 60   | 73             | 58             |
| Smartphone                     | Repletion of functions (1-100)    | 60    | 70   | 58             | 68             | 59    | 69   | 57             | 67             |

Supplementary Material

|                                   |                                                          |       |       |       |       |       |       |       |       |
|-----------------------------------|----------------------------------------------------------|-------|-------|-------|-------|-------|-------|-------|-------|
|                                   | Quality of design (1–100)                                | 80    | 60    | 77    | 57    | 82    | 62    | 79    | 59    |
| Notebook computer                 | Repletion of functions (1-100)                           | 65    | 75    | 63    | 73    | 67    | 77    | 65    | 75    |
|                                   | Price (thousand Yen)                                     | 60    | 90    | 65    | 95    | 66    | 96    | 71    | 101   |
| Tablet personal computer          | Price (thousand Yen)                                     | 15.0  | 20.0  | 15.8  | 20.8  | 16.0  | 21.0  | 16.8  | 21.8  |
|                                   | Repletion of functions (1-100)                           | 65    | 75    | 63    | 73    | 67    | 77    | 61    | 71    |
| Electronic keyboard               | Number of distinctive functions                          | 13    | 7     | 12    | 6     | 14    | 8     | 13    | 7     |
|                                   | Sound quality (1–100)                                    | 70    | 80    | 68    | 78    | 68    | 78    | 66    | 76    |
| Liquid crystal display television | Screen size (inch)                                       | 19    | 26    | 18    | 25    | 20    | 27    | 19    | 26    |
|                                   | Image quality (1-100)                                    | 80    | 70    | 78    | 68    | 78    | 68    | 76    | 66    |
| Single sofa                       | Price (thousand Yen)                                     | 14.00 | 10.00 | 14.67 | 10.67 | 13.20 | 9.20  | 13.87 | 9.87  |
|                                   | Comfort in seating (1–100)                               | 75    | 65    | 73    | 63    | 73    | 63    | 71    | 61    |
| Office chair                      | Comfort in seating (1–100)                               | 65    | 75    | 63    | 73    | 63    | 73    | 61    | 71    |
|                                   | Price (thousand Yen)                                     | 10.00 | 14.00 | 10.67 | 14.67 | 9.20  | 13.20 | 9.87  | 13.87 |
| Bed                               | Quality of design (1–100)                                | 60    | 79    | 57    | 76    | 62    | 81    | 59    | 78    |
|                                   | Price (thousand Yen)                                     | 17.0  | 24.0  | 18.2  | 25.2  | 17.7  | 24.7  | 18.9  | 25.9  |
| Bicycle                           | Price (thousand Yen)                                     | 20.0  | 15.0  | 20.8  | 15.8  | 21.0  | 16.0  | 21.8  | 16.8  |
|                                   | Quality of design (1–100)                                | 70    | 60    | 68    | 58    | 72    | 62    | 70    | 60    |
| Gas scooter                       | Quality of design (1–100)                                | 75    | 60    | 73    | 58    | 77    | 62    | 75    | 60    |
|                                   | Gas mileage (km per liter)                               | 60    | 70    | 58    | 68    | 59    | 69    | 67    | 67    |
| Hair salon                        | Magazine’s rating of skill (1–100)                       | 80    | 70    | 78    | 68    | 78    | 68    | 76    | 66    |
|                                   | Time taken to reach there from home (min)                | 37    | 19    | 40    | 22    | 33    | 15    | 36    | 18    |
| Fitness club                      | Repletion of equipment (1–100)                           | 80    | 65    | 78    | 63    | 78    | 63    | 76    | 61    |
|                                   | Time taken to reach the club from home (min)             | 28    | 15    | 30    | 17    | 26    | 13    | 28    | 15    |
| Rental apartment                  | Monthly rent (thousand Yen)                              | 55.0  | 60.0  | 55.8  | 60.8  | 53.9  | 58.9  | 54.7  | 59.7  |
|                                   | Walking distance from the station to the apartment (min) | 19    | 10    | 21    | 12    | 21    | 12    | 23    | 14    |
| Restaurant                        | Magazine’s rating of skill (1–100)                       | 75    | 65    | 73    | 63    | 73    | 63    | 71    | 61    |
|                                   | Time taken to reach the restaurant from school (min)     | 19    | 10    | 20    | 11    | 17    | 8     | 18    | 9     |

Note: Choice sets 1 and 2 consisted of 24 consumer products or services, their two attributes, and three alternatives (the target, competitor, and decoy), which also had two attribute values. “A” was a target when “A,” “B,” and “D<sub>A</sub>” were presented as alternatives, whereas “B” was a target when “A,” “B,” and “D<sub>B</sub>” were presented as alternatives.
